# Supplementary material for: BEHAV3D: a 3D live imaging platform for comprehensive analysis of engineered T cell behavior and tumor response
Source: Springer Nature journal article supplement (doi:10.1038/s41596-024-00972-6), 2024-03-19
Supplement: MOESM1 [file 41596_2024_972_MOESM1_ESM10.pdf]

# **BEHAV3D: a 3D live imaging platform for comprehensive analysis of engineered T cell behavior and tumor response**

In the format provided by the authors and unedited

## 1 **Supplementary Information**

2

3 **Supplementary Methods** Supplementary Protocol with Information of generation and culture  
4 of CAR19 T-cells.

5 **Supplementary Figure 1** Characterization of photobleaching and phototoxicity effects

6 **Supplementary Figure 2** Random Forest Classifier accuracy rates

7 **Supplementary Video 1.** Representative video of an imaging experiment performed on the  
8 Zeiss LSM 880. Left panel displays raw imaging data of a co-culture of CD8+ CAR19 cells  
9 (blue), CD4+ CAR19 cells (green) and ALL cells (yellow). Dead dye presence is visualized in  
10 red. Right panel displays segmented and tracked data CD8+ CAR19 cells (blue), CD4+  
11 CAR19 cells (green) and ALL cells (grey). The track of the CAR19 cells' represents cell path  
12 over the last hour.

13 **Supplementary Video 2.** Representative video of an imaging experiment performed on the  
14 Leica SP8. Left panel displays raw imaging data of a co-culture of CD8+ CAR19 cells (blue),  
15 CD4+ CAR19 cells (green) and ALL cells (yellow). Dead dye presence is visualized in red.  
16 Right panel displays segmented and tracked data CD8+ CAR19 cells (blue), CD4+ CAR19  
17 cells (green) and ALL cells (grey). The track of the CAR19 cells' represents cell path over the  
18 last hour.

19 **Supplementary Video 3.** Representative video showing one single TEG cell, displaying  
20 morphological plasticity and destroying an entire tumor organoid in over 10 hours. Left  
21 panel displays raw imaging data with TEG cells (blue), BC tumor organoid (yellow). Dead  
22 dye presence is visualized in red. Right panel displays segmented and tracked TEG cells  
23 (blue), BC tumor organoid (grey). Full T cells track is shown in blue.

24 **Supplementary Video 4.** Representative video showing one single motile CD8+ CAR19s,  
25 performing 5 tumor cell killings in 8 hours. CD8+ CAR19 cells (blue), CD4+ CAR19 cells  
26 (green) and ALL cells (yellow). Dead dye presence is visualized in red.

27 **Supplementary Table 1.** Table to quantify tracking accuracy metrics.

28

## 29 **Supplementary Methods 1**

### 30 **Information of generation and culture of CAR19 T-cells**

31 The CAR19 gene was constructed by linking the FMC-63 single chain variable fragment  
32 (GenBank ID: ADM64594.1) to a CD8 hinge (AA 138-206, Ref sequence ID NP\_001759.3)  
33 and transmembrane domain, 4-1BB (CD137, AA 214-241 UniProt sequence ID Q07011)

34 transactivation domain, and CD3zeta signaling domain (CD247, AA 52-121, Ref sequence ID:  
35 NP\_000725.1). The sequence was codon optimized and synthesized (Genscript), after which it  
36 was cloned in to the pCCL-cPPT-hPGK-ORF-bPRE4-SIN lentiviral transfer vector<sup>1</sup>. Lentiviral  
37 particles were produced using standard calcium phosphate transfection (Clontech, 631312) of  
38 HEK-293T-cells with the pMDL-g/pRRE, pMD2-VSVg, and pRSV-Rev plasmids<sup>2,3</sup>.  
39 Transducing units per mL of concentrated vector batches were determined using serial dilution  
40 on Jurkat cells followed by flow cytometric analysis using a biotin-conjugated CD19 CAR  
41 detection Reagent (Miltenyi Biotec, 130-129-550) and an APC-conjugated streptavidin reagent  
42 (Biolegend, 405207). Findings were confirmed using a serial dilution on HeLa cells followed  
43 by a qPCR to quantify the vector copy number of the construct within the DNA.  
44 PBMCs were separated from blood using Ficoll-Paque PLUS separation (Cytiva, 17-1440-03),  
45 after which cells were stained with an anti-CD3 FITC (Biolegend, UCHT1). T-cells were sorted  
46 with a Sony SH800S sorter based on CD3 expression. Afterwards, CD3<sup>+</sup> T-cells were  
47 stimulated and transduced at a multiplicity of infection of 10 according to a previously  
48 described protocol<sup>1</sup>.  
49 Following transduction, CD4<sup>+</sup> and CD8<sup>+</sup> cells were enriched separately with a MACS Cell  
50 Isolation kit (Miltenyi Biotec 130-045-101 & 130-045-201) according to manufacturer's  
51 instructions. After enrichment, purity and transduction efficiency were determined with flow  
52 cytometry using a panel with biotin-conjugated CD19 CAR detection Reagent (Miltenyi Biotec,  
53 130-129-550), APC-conjugated streptavidin reagent (Biolegend, 405207), CD3-BUV496 (BD,  
54 UCHT1), anti-CD8 APC (APC/Fire810, Biolegend, SK1), anti-CD4 BUV805 (BD, TPA-T4)  
55 and eFluor (Thermo Fisher, 65-0866-14). Data was acquired on a Cytex Aurora.

56

## 57 **References**

- 58 1. Presti, V. L. *et al.* Efficient lentiviral transduction method to gene modify cord blood CD8<sup>+</sup> T cells  
59 for cancer therapy applications. *Mol. Ther. - Methods Clin. Dev.* 21, 357–368 (2021).
- 60 2. Dull, T. *et al.* A Third-Generation Lentivirus Vector with a Conditional Packaging System.  
61 *J. Virol.* 72, 8463–8471 (1998).
- 62 3. Zufferey, R. *et al.* Self-Inactivating Lentivirus Vector for Safe and Efficient In Vivo Gene  
63 Delivery. *J. Virol.* 72, 9873–9880 (1998).

## 64 **Supplementary Figures**

## Supplementary Figure 1 Characterization of photobleaching and phototoxicity effects

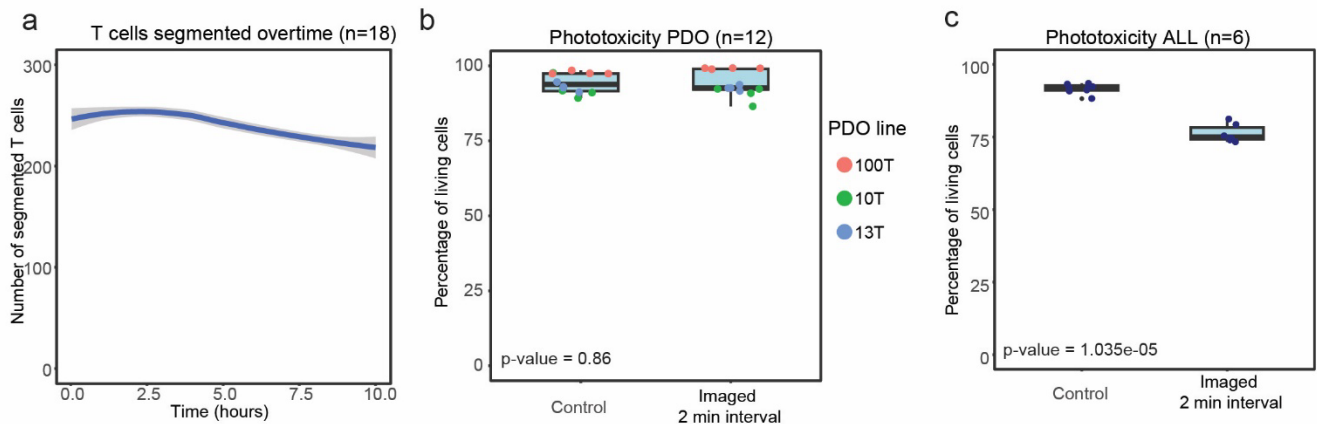

**Supplementary Figure 1 Characterization of photobleaching and phototoxicity effects (a)** Quantification of segmented eFluor labelled T cells at all timepoints demonstrates only a minor reduction in segmentation effectiveness due to photobleaching or phototoxicity (16.4%). Shown average values of 18 representative experiments. (b-c) Quantification of phototoxicity effect on PDOs (b) and ALL tumor cells (c) upon 16 hours of imaging. Number of voxels belonging to living and dead cells (b) were quantified by segmentation after 16 hours of imaging with a 2 minute interval on a LSM880 confocal system. For ALL cells number of single living and dead cells were quantified (c). As a control, wells were imaged only at the last timepoint. Individual points represent number of cells per well. Two-tailed unpaired t test was performed to compare conditions.

## Supplementary Figure 2 Random Forest Classifier accuracy rates

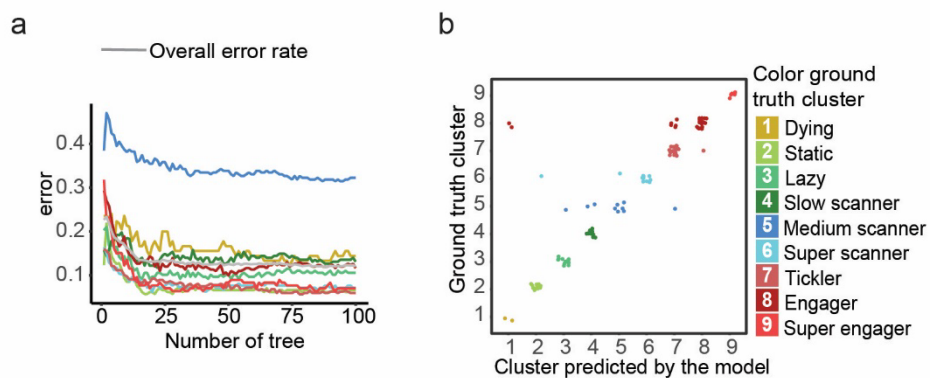

**Supplementary Figure 2 Random Forest Classifier accuracy rates.** Error rate of the training data per cluster and overall for all trees (a) and correlation plot between ground truth cluster classification and predicted cluster classification (b). In b color represents ground truth cluster. Figure is reused from Extended Data Fig 2 d-e of ref 8.
